1 ANME-2d anaerobic methanotrophic archaea differ from other ANME  
2 archaea in lipid composition and carbon source

3  
4 Julia M. Kurth<sup>ac</sup>, Nadine T. Smit<sup>bc</sup>, Stefanie Berger<sup>a</sup>, Stefan Schouten<sup>bc</sup>, Mike S.M. Jetten<sup>acd</sup>, Cornelia  
5 U. Welte<sup>acd</sup>

6 <sup>a</sup> Department of Microbiology, Institute for Water and Wetland Research, Radboud University,  
7 Heyendaalseweg 135, 6525 AJ Nijmegen, The Netherlands

8 <sup>b</sup> NIOZ Royal Netherlands Institute for Sea Research, Department of Marine Organic  
9 Biogeochemistry and Utrecht University, P.O. Box 59, 1790 AB Den Burg (Texel), The Netherlands

10 <sup>c</sup> Netherlands Earth System Science Center, Utrecht University, Heidelberglaan 2, 3584 CS Utrecht,  
11 The Netherlands

12 <sup>d</sup> Soehngen Institute of Anaerobic Microbiology, Radboud University, Heyendaalseweg 135, 6525  
13 AJ Nijmegen, The Netherlands

14  
15 Correspondence:

16 Julia Kurth, Department of Microbiology, Institute for Water and Wetland Research, Radboud  
17 University, Heyendaalseweg 135, 6525 AJ Nijmegen, The Netherlands; [j.kurth@science.ru.nl](mailto:j.kurth@science.ru.nl).

18 Cornelia Welte, [c.welte@science.ru.nl](mailto:c.welte@science.ru.nl).

19

## 20 Abstract

21 The anaerobic oxidation of methane (AOM) is a microbial process present in marine and freshwater  
22 environments. AOM is important for reducing the emission of the second most important greenhouse  
23 gas methane. In marine environments anaerobic methanotrophic archaea (ANME) are involved in  
24 sulfate-reducing AOM. In contrast, *Ca. Methanoperedens* of the ANME-2d cluster carries out nitrate  
25 AOM in freshwater ecosystems. Despite the importance of those organisms for AOM in non-marine  
26 environments not much is known about their lipid composition or carbon sources. To close this gap,  
27 we analyzed the lipid composition of ANME-2d archaea and found that they mainly synthesize  
28 archaeol and hydroxyarchaeol as well as different (hydroxy-) glycerol dialkyl glycerol tetraethers,  
29 albeit in much lower amounts. Abundant lipid headgroups were dihexose, monomethyl-phosphatidyl  
30 ethanolamine and phosphatidyl hexose. Moreover, a monopentose was detected as a lipid headgroup  
31 which is rare among microorganisms. Batch incubations with  $^{13}\text{C}$  labelled bicarbonate and methane  
32 showed that methane is the main carbon source of ANME-2d archaea varying from ANME-1 archaea  
33 which primarily assimilate dissolved inorganic carbon (DIC). ANME-2d archaea also assimilate DIC,  
34 but to a lower extent than methane. The lipid characterization and analysis of the carbon source of *Ca.*  
35 *Methanoperedens* facilitates distinction between ANME-2d and other ANMEs.

## 36 Introduction

37 Methane is the second most important greenhouse gas on earth with an atmospheric methane budget of  
38 about 600 Tg per year (Conrad, 2009; Dean *et al.*, 2018). About 69% of methane emission into the  
39 atmosphere is caused by methanogenic archaea (Conrad, 2009). Fortunately aerobic and anaerobic  
40 methanotrophic microorganisms can oxidize methane back to carbon dioxide that is a 25-times less  
41 potent greenhouse gas than methane. The anaerobic oxidation of methane (AOM) is a microbial  
42 process present in marine and freshwater environments. AOM has first been described to be performed  
43 by a consortium of anaerobic methanotrophic archaea (ANME) and sulfate-reducing bacteria in  
44 microbial mats in the deep sea or in marine sediments (Hoehler *et al.*, 1994; Hinrichs *et al.*, 1999;  
45 Boetius *et al.*, 2000; Hinrichs and Boetius, 2002; Orphan *et al.*, 2002). ANME archaea are related to  
46 methanogens and oxidize methane by using the reverse methanogenesis pathway (Hallam *et al.*, 2004;  
47 Arshad *et al.*, 2015; McAnulty *et al.*, 2017; Timmers *et al.*, 2017). In addition to sulfate, also oxidized  
48 nitrogen compounds (Raghoebarsing *et al.*, 2006; Ettwig *et al.*, 2010; Haroon *et al.*, 2013) as well as  
49 iron and manganese (Beal *et al.*, 2009; Ettwig *et al.*, 2016; Cai *et al.*, 2018) can be used as electron  
50 acceptors within the AOM process.

51 Anaerobic methanotrophic archaea can be assigned to three distinct clusters within the Euryarchaeota,  
52 ANME-1, ANME-2 and ANME-3, which are related to the orders *Methanosarcinales* and  
53 *Methanomicrobiales* (Knittel and Boetius, 2009). The phylogenetic distance between the groups is  
54 quite large (16S rRNA gene sequence identity between 75-92%) (Knittel and Boetius, 2009). Most  
55 analysed members of the three ANME clades have been described to perform sulfate driven AOM in  
56 marine environments (Pancost *et al.*, 2001; Blumenberg *et al.*, 2004; Niemann and Elvert, 2008;  
57 Rossel *et al.*, 2008; Wegener *et al.*, 2008; Kellermann *et al.*, 2012). However, members of the ANME-  
58 2d cluster have not been found in consortia with sulfate reducers. Instead, ANME-2d archaea are the  
59 main players in nitrate-dependent AOM. Microorganisms conducting nitrate AOM have been enriched  
60 from anoxic freshwater sediments, digester sludge and rice paddies (Raghoebarsing *et al.*, 2006; Hu *et al.*,  
61 2009; Arshad *et al.*, 2015; Vaksmaa, Guerrero-Cruz, *et al.*, 2017). Denitrifying AOM can either be  
62 conducted by a consortium of nitrate-reducing ANMEs, *Ca. Methanoperedens* sp., and nitrite reducing  
63 NC10 bacteria, *Ca. Methylomirabilis* sp. (Raghoebarsing *et al.*, 2006; Haroon *et al.*, 2013; Arshad  
64 *et al.*, 2015) or by a consortium of those ANME archaea and anammox bacteria (Haroon *et al.*, 2013). In  
65 those consortia *Ca. Methylomirabilis* sp. or anammox bacteria are important to reduce the toxic nitrite  
66 produced during nitrate AOM by *Ca. Methanoperedens* sp.

67 To understand the prevalence of anaerobic methane oxidation in past and present environments and  
68 identify the key players at different environmental sites, it is necessary to identify biomarkers for those  
69 organisms. As core lipids are much more stable than DNA over time, lipid biomarkers are a useful tool  
70 to trace microorganisms and therefore specific microbial processes back in time. Moreover, intact  
71 polar lipids are crucial to examine present microbial communities and to distinguish between different  
72 microorganisms (Ruetters *et al.*, 2002; Sturt *et al.*, 2004). Quite some information is available on core  
73 and intact polar lipids as well as on carbon assimilation in marine AOM consortia of ANME archaea  
74 and sulfate-reducing bacteria (Pancost *et al.*, 2001; Blumenberg *et al.*, 2004; Niemann and Elvert,  
75 2008; Rossel *et al.*, 2008; Wegener *et al.*, 2008; Kellermann *et al.*, 2012). In contrast, lipids from one  
76 of the main players in denitrifying AOM, *Ca. Methanoperedens* sp., have hardly been studied: a  
77 preliminary study on the lipids of a culture containing *Ca. Methanoperedens* sp. and *Ca.*

78 *Methylophilum oxyfera* only detected sn2-hydroxyarchaeol as the dominant lipid of the archaeal  
79 partner (Raghoebarsing *et al.*, 2006).

80 Besides the characterization of lipids in ANME archaea it is also pivotal to understand which carbon  
81 source those organisms use for biomass production. The main carbon assimilation pathway in  
82 methanogenic Euryarchaeota is the reductive acetyl-CoA pathway (Whitman, 1994; Berg *et al.*, 2010).  
83 In this pathway a carbonyl group and a methyl group are combined to form acetyl-CoA. In archaea,  
84 acetyl-CoA is used for formation of membrane lipids via the isoprenoid compound  
85 geranylgeranylphosphate in the mevalonate pathway, although not all of the enzymes involved in this  
86 pathway are known with certainty (Koga and Morii, 2007; Matsumi *et al.*, 2011). An ether bond is  
87 formed between the glycerol-1-phosphate backbone and the isoprenoid side chains. Subsequently  
88 cytidine-diphosphate is attached and finally the unsaturated isoprenoid side chains are reduced to form  
89 diphytanylglycerol diether, also known as archaeol (Matsumi *et al.*, 2011).

90 The isotopic composition of lipids provides information on the carbon source used by the  
91 microorganism. The lipids of ANMEs involved in AOM are usually strongly depleted in  $^{13}\text{C}$ , with  
92  $\delta^{13}\text{C}$  values ranging from  $-70$  to  $-130\%$  (Elvert *et al.*, 1999; Pancost *et al.*, 2000; Niemann and Elvert,  
93 2008). Such low  $\delta^{13}\text{C}$  values of lipids have been explained by the assimilation of  $^{13}\text{C}$ -depleted methane  
94 carbon during methane uptake into biomass (Elvert *et al.*, 1999; Hinrichs *et al.*, 1999; Pancost *et al.*,  
95 2000; Orphan *et al.*, 2002). Mixed assimilation of  $\text{CH}_4$  and  $\text{CO}_2$  has been reported for marine ANME-  
96 1, -2a, and -2b strains indicating that at least some ANME strains can use methane-derived carbon for  
97 biomass production (Wegener *et al.*, 2008). However, for ANME-1 it has been shown that methane  
98 oxidation is decoupled from the assimilatory system and that  $\text{CO}_2$ -dependent autotrophy is the  
99 predominant mode of carbon fixation (Kellermann *et al.*, 2012). In general, ANME archaea seem to be  
100 able to assimilate both, methane and dissolved inorganic carbon, and the preferred carbon source for  
101 assimilation might vary between the different ANME clusters.

102 In this study, we performed analysis of the lipids from ANME-2d archaea and compared these with  
103 previous studies about different ANME lipids. Moreover, we analysed the incorporation of  $^{13}\text{C}$ -  
104 labelled methane and bicarbonate in lipids of these archaea to establish the carbon sources used for  
105 assimilation.

## 106           **Methods**

### 107           **ANME-2d bioreactor operation and sampling for lipid analysis**

108           For lipid analysis of *Ca. Methanoperedens* sp. two different bioreactors were sampled. One bioreactor  
109           contained archaea belonging to the ANME-2d clade enriched from the Ooijpolder (NL) (Arshad *et al.*,  
110           2015; Berger *et al.*, 2017) and the other reactor ANME-2d archaea enriched from an Italian paddy  
111           field (Vaksmas, Jetten, *et al.*, 2017). The anaerobic enrichment culture dominated by *Ca.*  
112           *Methanoperedens* sp. strain BLZ2 originating from the Ooijpolder (Berger *et al.*, 2017) was  
113           maintained in an anaerobic 10 L sequencing batch reactor (30°C, pH 7.3 ± 0.1, stirred at 180 rpm).  
114           The mineral medium consisted of 0.16 g/L MgSO<sub>4</sub>, 0.24 g/L CaCl<sub>2</sub> and 0.5 g/L KH<sub>2</sub>PO<sub>4</sub>. Trace  
115           elements and vitamins were supplied using stock solutions. 1000 x trace element stock solution: 1.35  
116           g/L FeCl<sub>2</sub> x 4 H<sub>2</sub>O, 0.1 g/L MnCl<sub>2</sub> x 4 H<sub>2</sub>O, 0.024 g/L CoCl<sub>2</sub> x 6 H<sub>2</sub>O, 0.1 g/L CaCl<sub>2</sub> x 2 H<sub>2</sub>O, 0.1 g/L  
117           ZnCl<sub>2</sub>, 0.025 g/L CuCl<sub>2</sub> x 2 H<sub>2</sub>O, 0.01 g/L H<sub>3</sub>BO<sub>3</sub>, 0.024 g/L Na<sub>2</sub>MoO<sub>4</sub> x 2 H<sub>2</sub>O, 0.22 g/L NiCl<sub>2</sub> x 6  
118           H<sub>2</sub>O, 0.017 g/L Na<sub>2</sub>SeO<sub>3</sub>, 0.004 g/L Na<sub>2</sub>WO<sub>4</sub> x 2 H<sub>2</sub>O, 12.8 g/L nitrilotriacetic acid; 1000 x vitamin  
119           stock solution: 20 mg/L biotin, 20 mg/L folic acid, 100 mg/L pyridoxine-HCl, 50 mg/L thiamin-HCl x  
120           2 H<sub>2</sub>O, 50 mg/L riboflavin, 50 mg/L nicotinic acid, 50 mg/L D-Ca-pantothenate, 2 mg/L vitamin B12,  
121           50 mg/L p-aminobenzoic acid, 50 mg/L lipoic acid. The medium supply was continuously sparged  
122           with Ar:CO<sub>2</sub> in a 95:5 ratio. Per day 30 mmol nitrate added to the medium were supplied to the  
123           bioreactor and were completely consumed. Methane was added by continuously sparging the reactor  
124           content with CH<sub>4</sub>:CO<sub>2</sub> in a 95:5 ratio at a rate of 15 mL/min. The reactor was run with a medium  
125           turnover of 1.25 L per 12 h. A 5 min settling phase for retention of biomass preceded the removal of  
126           supernatant. Under these conditions nitrite was not detectable with a colorimetric test with a lower  
127           detection limit of 2 mg/L (MQuant test stripes, Merck, Darmstadt, Germany). Growth conditions and  
128           operation of the bioreactor containing ANME-2d archaea enriched from an Italian paddy field soil are  
129           described by Vaksmas *et al.*, 2017 (Vaksmas, Jetten, *et al.*, 2017). Sampled material from both reactors  
130           was centrifuged (10000 x g, 20 min, 4°C) and pellets were kept at -80°C until subsequent freeze-  
131           drying and following lipid and isotope analysis.

132

### 133           **Analysis of the microbial community**

134           For the Ooijpolder enrichment we performed whole genome metagenome sequencing. DNA  
135           extraction, library preparation and metagenome sequencing were performed as described before by  
136           Berger and co-workers (Berger *et al.*, 2017). Quality-trimming, sequencing adapter removal and  
137           contaminant filtering of Illumina paired-end sequencing reads were performed using BBTools BBDuk  
138           37.76 (BBMap - Bushnell B. - sourceforge.net/projects/bbmap/). Processed paired-end reads were  
139           assigned to a taxon using Kaiju 1.6.2 (Menzel *et al.*, 2016) employing the NCBI BLAST non-  
140           redundant protein database (NCBI Resource Coordinators, 2016).

141

### 142           **Batch cultivation of ANME-2d bioreactor cell material for <sup>13</sup>C-labelling experiment**

143           60 ml bioreactor material of a *Ca. Methanoperedens* sp. BLZ2 culture enriched from the Ooijpolder  
144           (Arshad *et al.*, 2015; Berger *et al.*, 2017) were transferred with a syringe to a 120-ml serum bottle that  
145           had been made anoxic by flushing the closed bottle with argon gas for 10 min. Afterwards, the culture  
146           was purged with 90% argon and 10% CO<sub>2</sub> for 5 min. 2.5 mM NaHCO<sub>3</sub> and 18 ml methane (Air

147 Liquide, Eindhoven, The Netherlands) were added. Except for the negative controls, either <sup>13</sup>C-  
148 labelled methane (99 atom%; Isotec Inc., Matheson Trigas Products Division) or <sup>13</sup>C-labelled  
149 bicarbonate (Cambridge Isotope Laboratories Inc., Tewksbury, USA) was used in the batch  
150 incubations. The bottles were incubated horizontally on a shaker at 30°C and 250 rpm for one or three  
151 days. All bottles contained sodium nitrate (0.6 mM) at the start of incubation and additional nitrate  
152 was added when the concentration in the bottles was close to 0, as estimated by MQuant (Merck,  
153 Darmstadt, Germany) test strips. The methane concentration in the headspace was measured twice a  
154 day by gas chromatography with a gas chromatograph (Hewlett Packard 5890a, Agilent Technologies,  
155 Santa Clara CA, US) equipped with a Poropak Q 100/120 mesh and a thermal conductivity detector  
156 (TCD) using N<sub>2</sub> as carrier gas. Each measurement was performed by injection of 50 µl headspace gas  
157 with a gas-tight syringe. With this technique a decrease in methane concentration from ~24 % to ~20  
158 % within three days of incubation was observed. After batch incubation, cell material was centrifuged  
159 (10000 x g, 20 min, 4°C) and pellets were kept at -80°C until subsequent freeze-drying and following  
160 lipid and isotope analysis. It has to be considered that cultures with <sup>13</sup>C-labelled bicarbonate also  
161 contained <sup>12</sup>C derived from CO<sub>2</sub>. Having in mind that 10% of CO<sub>2</sub> were added to the culture (pCO<sub>2</sub>=  
162 0.1 atm) the CO<sub>2</sub> concentration in the solution was calculated to be about 3.36 mM by use of the  
163 equation [CO<sub>2</sub>]<sub>aq</sub>= pCO<sub>2</sub>/k<sub>h</sub> (Henry constant (k<sub>h</sub>) is 29.76 atm/(mol/L) at 25°C). Therefore, it has to be  
164 assumed that about half of the carbon in the cultures where <sup>13</sup>C labelled bicarbonate was added derived  
165 from <sup>12</sup>C-CO<sub>2</sub> dissolved in the medium after gassing with a mixture of 10% CO<sub>2</sub>/90% Ar gas.

166

#### 167 **Lipid extraction and analysis**

168 **Bligh and Dyer extraction** - Lipids of freeze-dried biomass (between 20 and 70 mg) were extracted by  
169 a modified Bligh and Dyer method as described by Bale et al. (Bale *et al.*, 2013) using a mixture of  
170 methanol, dichloromethane and phosphate buffer at pH 7.4 (2:1:0.8 v/v/v). After ultrasonic extraction  
171 (10 min) and centrifugation the solvent layer was collected. The residue was re-extracted twice. The  
172 combined solvent layers were separated by adding additional DCM and phosphate buffer to achieve a  
173 ratio of MeOH, DCM and phosphate buffer (1:1:0.9 v/v/v). The separated organic DCM layer on the  
174 bottom was removed and collected while the aqueous layer was washed two more times with DCM.  
175 The combined DCM layer was evaporated under a continuous stream of nitrogen.

176 **Acid hydrolysis** - Head groups of archaeal lipids were removed using acid hydrolysis. About 20 mg  
177 freeze-dried biomass was hydrolyzed with 2 ml of a 1.5 N HCl/MeOH solution and samples stirred for  
178 2 h while heated at 130°C with a reflux system. After cooling, the pH was adjusted to pH 4-5 by  
179 adding 2 N KOH/MeOH solution. 2 ml DCM and 2 ml distilled H<sub>2</sub>O were added. The DCM bottom  
180 layer was transferred to a new vial and the MeOH/H<sub>2</sub>O layer washed twice with DCM. Combined  
181 DCM layers were dried over a Na<sub>2</sub>SO<sub>4</sub> column and the solvent removed by evaporation under a stream  
182 of nitrogen.

183 **BF<sub>3</sub> methylation and silylation** - For gas chromatography (GC) analysis aliquots of the acid  
184 hydrolyzed samples were methylated using 0.5 ml of BF<sub>3</sub>-methanol and react for 10 min at 60°C in a  
185 oven. 0.5 ml H<sub>2</sub>O and 0.5 ml DCM were added to the heated mixture to separate the DCM and  
186 aqueous layers. Samples were mixed, centrifuged and the DCM-layer taken off and collected. The  
187 water layer was washed three more times with DCM. The combined DCM-layer were evaporated  
188 under a N<sub>2</sub> stream and water was removed by use of a MgSO<sub>4</sub> column. After dissolving the sample in

189 ethyl acetate, the extract was cleaned over a small silicagel column and lipids were eluted with ethyl  
190 acetate. The extract was dried under N<sub>2</sub>. For GC analysis, extracts (0.3 to 0.5 mg) were dissolved in 10  
191 µl pyridine and 10 µl BSTFA. Samples were heated for 30 min at 60°C and afterwards diluted with  
192 ethyl acetate to 1 mg/ml.

193 **GC-MS** – Gas chromatography linked to mass spectrometry (GC-MS) was performed with a 7890B  
194 gas chromatography system (Agilent) connected to a 7000 GC/MS Triple Quad (Agilent). The gas  
195 chromatograph was equipped with a fused silica capillary column (25 m x 0.32 mm) coated with CP  
196 Sil-5 CB (0.12 µm film thickness) and a Flame Ionization Detector (FID). Helium was used as the  
197 carrier gas. The samples were injected manually at 70°C via an on-column injector. The oven  
198 temperature was programmed to a temperature increase from 70 to 130°C with 20°C/min and a further  
199 increase to 320°C with 4°C/min to, 320°C was held for 10 min. The mass range of the mass  
200 spectrometer was set to scan from m/z 50 to m/z 850.

201 **GC-IRMS** – Gas chromatography coupled to isotope-ratio mass spectrometry (GC-IRMS) was  
202 performed on a TRACE 1310 Gas Chromatograph (Thermo Fisher Scientific) interfaced with a  
203 Scientific GC IsoLink II Conversion Unit connected to an IRMS DELTA V Advantage Isotope-ratio  
204 mass spectrometer (Thermo Fisher Scientific). The gas chromatograph was equipped with a fused  
205 silica capillary column (25 m x 0.32 mm) coated with CP Sil-5 CB (0.12 µm film thickness). Helium  
206 was used as the carrier gas. The samples were injected at 70°C via an on-column injector. The oven  
207 temperature was programmed to a temperature increase from 70 to 130°C with 20°C/min and a further  
208 increase to 320°C with 4°C/min, 320°C was held for 10 min. δ<sup>13</sup>C values were corrected for methyl  
209 group derived from BF<sub>3</sub> methanol in case of carboxylic acid group (bacterial lipids) and methyl groups  
210 derived from BSTFA in case of hydroxyl groups (mainly archaeal lipids). Averaged δ<sup>13</sup>C values are  
211 based on experimental triplicates, but not on analytical duplicates.

212 **UHPLC-APCI-TOF-MS** - About 0.4 to 0.8 mg of the acid hydrolyzed lipid extract was dissolved in a  
213 mixture of hexane/isopropanol 99:1. Extracts were filtered by use of a 0.45 µm, 4 mm diameter PTFE  
214 filter. About 2 mg per ml core lipid containing extracts were used for analysis by ultra-high  
215 performance liquid chromatography linked to time-of-flight atmospheric pressure chemical ionization  
216 mass spectrometry using a (UHPLC-APCI-TOFMS). Core lipid analysis was performed on an Agilent  
217 1260 Infinity II UHPLC coupled to an Agilent 6230 TOF-MS. Separation was achieved on two  
218 UHPLC silica columns (BEH HILIC columns, 2.1 x 150 mm, 1.7 µm; Waters) in series maintained at  
219 25°C. The injection volume was 10 µl. Lipids were eluted isocratically for 10 min with 10% B,  
220 followed by a linear gradient to 18% B in 15 min, then a linear gradient to 30% B in 25 min, then a  
221 linear gradient to 100% B in 30 min, and finally 100% B for 20 min, where A is hexane and B is  
222 hexane: isopropanol (9:1). Flow rate was 0.2 ml/min and pressure 400 bar. Total run time was 120 min  
223 with a 20 min re-equilibration. Settings of the ion source (APCI) were as followed: gas temperature  
224 200°C, vaporizer 400°C, drying gas 6 l/min, nebulizer 60 psig. The lipids were identified using a  
225 positive ion mode (600–1400 m/z). 4mm PTFE filter (polypropylene...).

226 **UHPLC-ESI-MS** - 0.3 to 0.7 mg of Bligh and Dyer sample was dissolved in an injection solvent  
227 composed of hexane/isopropanol/water (72:27:1;v/v/v) and filtered through a 0.45 µm regenerated  
228 cellulose filter with 4 mm diameter prior to analysis by ultra-high performance liquid chromatography  
229 linked to ion trap mass spectrometry using electrospray ionization (UHPLC-ESI-MS). UHPLC  
230 separation was conducted on an Agilent 1200 series UHPLC equipped with a YMC-Pack Diol-120-NP

231 column (250 x 2.1 mm, 5  $\mu$ m particle size) and a thermostated autoinjector, coupled to a Thermo LTQ  
232 XL linear ion trap with Ion Max source with electrospray ionization (ESI) probe (Thermo Scientific,  
233 Waltham, MA). Solvent A contained 79% hexane, 20% isopropanol, 0.12% formic acid, 0.04%  
234 ammonium and solvent B 88% isopropanol, 10 % H<sub>2</sub>O, 0.12% formic acid, 0.04% ammonium. Lipids  
235 were eluted with 0% B for 1 min, a linear gradient from 0 to 34% B in 17 min, 34% B for 12 min,  
236 followed by a linear gradient to 65% B in 15 min, 65% B for 15 min and finally a linear gradient to  
237 100% B in 15 min. The IPLs were identified using a positive ion mode (m/z 400–2000) and a collision  
238 energy of 35 eV.

## 239 Results and Discussion

### 240 Analysis of microbial community

241 We performed phylogenetic analysis of the microbial community in the ANME-2d enrichment  
242 originating from the Ooijpolder. Twenty-three percent of the reads were assigned to *Ca.*  
243 *Methanoperedens* sp. strain BLZ2, 33% to *Ca.* *Methylomirabilis* sp. acting as nitrite scavenger, 8% to  
244 Alphaproteobacteria, 6% to Gammaproteobacteria, 5% to Betaproteobacteria 1% to  
245 Deltaproteobacteria, 3% to Terrabacteria, 3% to Sphingobacteria and 1% to Planctobacteria. The only  
246 archaeon in the bioreactor was *Ca.* *Methanoperedens* sp. strain BLZ2. Analysis of the microbial  
247 community in the Italian paddy field ANME-2d enrichment has been described by Vaksmaa et al.,  
248 2017. For this bioreactor a similar proportion (22%) of ANME-2d archaea, in this case *Ca.*  
249 *Methanoperedens* sp. strain Vercelli, was detected. In this study we mainly show the results derived  
250 from lipid analysis of the *Ca.* *Methanoperedens* sp. BLZ2 enrichment originating from the Ooijpolder  
251 (Arshad *et al.*, 2015; Berger *et al.*, 2017). However, the results deriving from a *Ca.* *Methanoperedens*  
252 sp. Vercelli enrichment originating from Italian paddy field soil (Vaksmaa, Jetten, *et al.*, 2017) look  
253 very similar, indicating that our results are not dependent on the strain or the environment from which  
254 the strain was enriched.



## 255 Core lipids of *Ca. Methanoperedens* sp.

256 To analyze the lipids of ANME-2d archaea, biomass from a bioreactor containing *Ca.*  
257 *Methanoperedens* sp. BLZ2 enrichment was sampled and core lipid analysis with GC-MS and  
258 UHPLC-APCI-TOF-MS was performed.

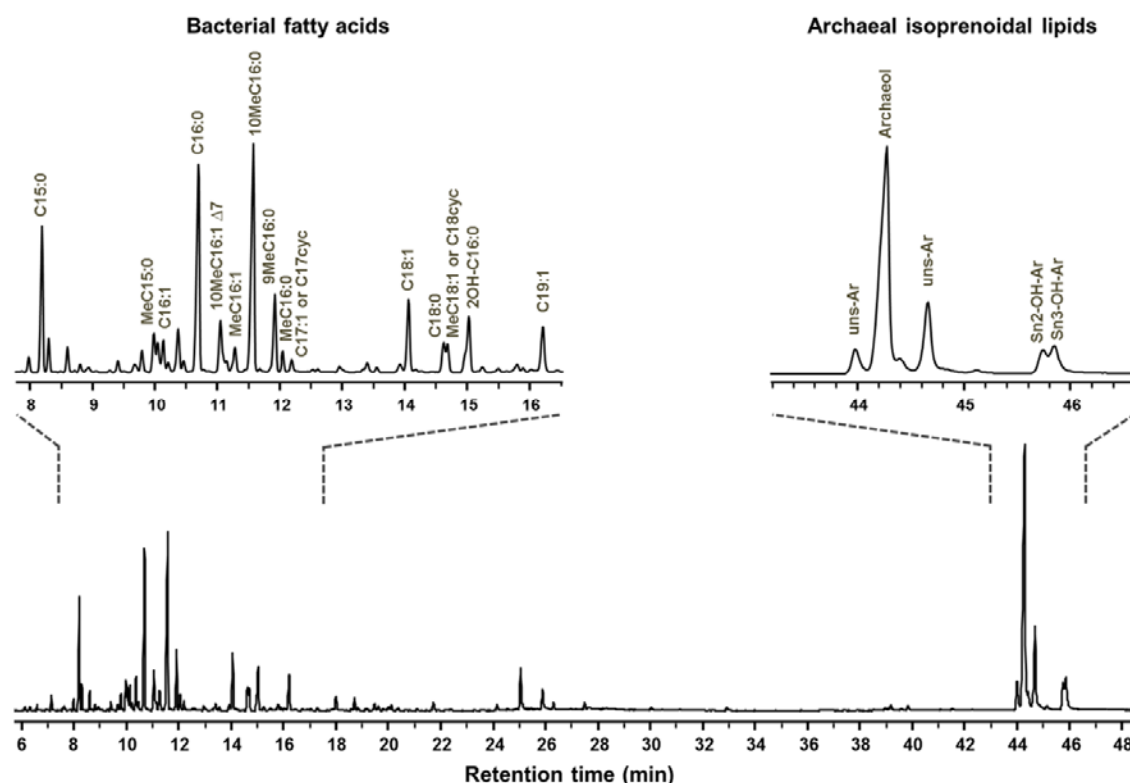

259

260 **Figure 1: Gas chromatogram of core lipids released by acid hydrolysis from *Ca. Methanoperedens* sp.**  
261 **(ANME-2d) enrichment.**

262 The enriched biomass of ANME-2d originates from the Ooijpolder (NL) (Arshad *et al.*, 2015). Enlarged inserts  
263 show the TIC (total ion chromatogram) of the bacterial and archaeal lipids. The most abundant compounds are  
264 annotated with their compound name and following abbreviations: Uns-Ar = monounsaturated archaeol, OH-Ar  
265 = hydroxyarchaeol.

266 GC analysis of the core lipids released by acid hydrolysis showed that of the microbial community  
267 harbored bacterial fatty acids and isoprenoidal archaeal lipids (Figure 1). We detected the typical  
268 membrane lipids of *Ca. Methylomirabilis* sp., namely 10-methylhexadecanoic acid (10MeC<sub>16:0</sub>) and its  
269 monounsaturated variant (10MeC<sub>16:1Δ7</sub>) (Kool *et al.*, 2012). The archaeal isoprenoids were  
270 predominantly composed of archaeol with lower amounts of sn2-hydroxyarchaeol and sn3-  
271 hydroxyarchaeol as well as two monounsaturated archaeols (Nichols and Franzmann, 1992).  
272 Monounsaturated archaeol has already been described to be present in samples of archaea associated  
273 with anaerobic methane oxidation in marine environments (Pancost *et al.*, 2001; Blumenberg *et al.*,  
274 2005). However, the monounsaturated archaeol might be produced from hydroxyarchaeol during  
275 acidic treatment of the lipids and therefore might not be part of native membrane lipid structures  
276 (Ekiel and Sprott, 1992). Alternation of the hydroxyarchaeol structure caused by different reaction  
277 conditions during lipid treatment has also been shown by Hinrichs and co-workers (Hinrichs *et al.*,  
278 2000). On the other hand, monounsaturated archaeols have also been described for *Halorubrum*  
279 *lacusprofundi* (Franzmann *et al.*, 1988; Gibson *et al.*, 2005), *Methanopyrus kandleri* (Nishihara *et al.*,

280 2002), *Methanococcoides burtonii* (Nichols and Franzmann, 1992; Nichols *et al.*, 1993), even if using  
 281 mild alkaline hydrolysis instead of acidic treatment for lipid extraction (Nishihara *et al.*, 2002).

282 One possibility to distinguish between the different ANME groups is the sn2-hydroxyarchaeol to  
 283 archaeol proportion (Blumenberg *et al.*, 2004). For ANME-1 this ratio is described to be 0-0.8, for  
 284 marine ANME-2 1.1 to 5.5 and for ANME-3 within the range of ANME-2 (Blumenberg *et al.*, 2004;  
 285 Niemann *et al.*, 2006; Nauhaus *et al.*, 2007; Niemann and Elvert, 2008). In our study with the non-  
 286 marine ANME-2d archaea we observed a sn2-hydroxyarchaeol to archaeol ratio of around 0.2. As  
 287 mentioned before, the monounsaturated archaeol species might be an artefact of hydroxyarchaeol. If  
 288 the monounsaturated archaeols are added to that of the sn2-hydroxyarchaeol abundance, the ratio  
 289 would still be only around 0.3. That means that the hydroxyarchaeol to archaeol ratio of ANME-2d is  
 290 more similar to that of ANME-1 archaea than to that of other ANME-2 or ANME-3 archaea. Members  
 291 of the related methanogen order *Methanomicrobiales* only contain archaeol and GDGT-0 in their  
 292 membranes but not hydroxyarchaeol (Koga *et al.*, 1998). In the order *Methanosarcinales* the lipid  
 293 composition varies between the different members. Most strains produce archaeol and  
 294 hydroxyarchaeol, but the ratio differs and also the type of hydroxyarchaeol isomer varies.  
 295 *Methanosarcinaceae* mainly produce the sn2-isomer, whereas *Methanosaetaceae* mainly produce the  
 296 rare sn3-isomer (Koga *et al.*, 1998).

297 Subsequently, UHPLC-APCI-TOF-MS analysis of the lipid extract was conducted in order to obtain  
 298 information about the tetraether lipids. This revealed that the relative abundance of archaeol was two  
 299 times higher than that of glycerol dialkyl glycerol tetraethers (GDGTs) (Table 1). Moreover, several  
 300 types of GDGTs were present in the enrichment. GDGTs contained either no (GDGT-0), one (GDGT-  
 301 1) or two (GDGT-2) cyclopentane rings and about 64% of the GDGTs were hydroxylated (OH-  
 302 GDGTs). The most abundant GDGTs were GDGT-0 with 6% and di-OH-GDGT-2 with 5% of total  
 303 lipids. In conclusion, ANME-2d archaea synthesize various core-GDGTs, however archaeol and its  
 304 homologues are the main isoprenoidal core-lipids in this enrichment.

305 **Table 1: Abundance of archaeol and GDGTs of *Ca. Methanoperedens* sp.**

306 Lipid extraction was performed in quadruplicates, error is given as standard deviation. For calculation of the  
 307 relative abundance of archaeol also peaks derived from archaeol artefacts created during the experimental  
 308 procedure were used.

| Lipid                    | Relative abundance (%) | Relative abundance (%) |
|--------------------------|------------------------|------------------------|
| Archaeol                 | 68 ± 5                 | 68 ± 5                 |
| GDGT-0                   | 6 ± 1                  |                        |
| GDGT-1                   | 3 ± 1                  |                        |
| GDGT-2                   | 2 ± 1                  |                        |
| OH-GDGT-1                | 3 ± 1                  |                        |
| OH-GDGT-2                | 1 ± 1                  | 32 ± 5                 |
| di-OH-GDGT-1             | 3 ± 2                  |                        |
| di-OH-GDGT-2             | 5 ± 2                  |                        |
| other GDGT-2 derivatives | 9 ± 4                  |                        |

309 Environmental samples from Mediterranean cold seeps with marine AOM associated archaea mainly  
 310 contained GDGTs with 0 to 2 cyclopentane rings (Pancost *et al.*, 2001). In a study on distinct  
 311

312 compartments of AOM-driven carbonate reefs growing in the northwestern Black Sea, GDGTs could  
313 only be found in samples when ANME-1 archaea were present, but not when only ANME-2 archaea  
314 were found, which led to the conclusion that ANME-2 archaea are not capable of synthesizing  
315 internally cyclized GDGT (Blumenberg *et al.*, 2004). Later on in a study on methanotrophic consortia  
316 at cold methane seeps, samples associated with ANME-2c were shown to contain relatively high  
317 amounts of GDGTs (Elvert *et al.*, 2005). In general, GDGTs are dominant in ANME-1 communities,  
318 while in marine ANME-2 and ANME-3 communities archaeol derivatives are most abundant  
319 (Niemann and Elvert, 2008; Rossel *et al.*, 2008). Members of the related methanogen order  
320 *Methanomicrobiales* produce relatively high amounts of GDGT-0 (Koga *et al.*, 1998; Schouten *et al.*,  
321 2012), whereas *Methanosarcinales* produce no or only minor amounts of GDGTs, mainly GDGT-0  
322 (De Rosa and Gambacorta, 1988; Nichols and Franzmann, 1992; Schouten *et al.*, 2012). Hydroxylated  
323 GDGTs seem to be relatively rare. In marine sediment samples the hydroxy-GDGT to total core  
324 GDGT ratio has been shown to vary between 1 and 8 % and the dihydroxy-GDGT to total core GDGT  
325 ratio is below 2% (Liu *et al.*, 2012). Hydroxylated GDGTs have so far only been identified in the  
326 methanogenic Euryarchaeon *Methanothermococcus thermolithotrophicus* (Liu *et al.*, 2012) and in  
327 several Thaumarchaeota (Schouten *et al.*, 2012; Sinninghe Damsté *et al.*, 2012). Until now only  
328 hydroxylated GDGTs with 0 to 2 cyclopentane rings have been found (Liu *et al.*, 2012; Schouten *et al.*,  
329 *et al.*, 2012; Sinninghe Damsté *et al.*, 2012).

330

331 Comparing the results obtained in this study and lipid characterizations of marine ANMEs, it is  
332 apparent that the ratio of archaeol and GDGTs are distinctive in the different ANME groups: ANME-1  
333 and partially ANME-2c contain substantial amounts of GDGTs and especially in ANME-1, GDGTs  
334 are the predominant membrane lipids (Niemann and Elvert, 2008). In contrast to ANME-1, but similar  
335 to other ANME-2 and ANME-3, we found that the dominating lipids in the membrane of clade  
336 ANME-2d archaea were archaeol variants and not GDGTs. However, about 30% of the membrane  
337 lipids in ANME-2d archaea were GDGTs. Most strikingly, the majority of those GDGTs were  
338 hydroxylated, which is quite rare and has not been observed for other ANMEs so far.

339

#### 340 **Intact polar lipids of *Ca. Methanoperedens* sp.**

341 Although intact polar lipids (IPLs) degrade more quickly than core lipids, IPLs are of higher  
342 taxonomic specificity and therefore useful to study especially present environments (Ruetters *et al.*,  
343 2002; Sturt *et al.*, 2004). To identify IPLs of *Ca. Methanoperedens* archaea, UHPLC-ESI-MS was  
344 performed.

345 The three most abundant archaeal IPLs detected were archaeol with a dihexose headgroup and  
346 hydroxyarchaeol with either a monomethyl phosphatidyl ethanolamine (MMPE) or a phosphatidyl  
347 hexose (PH) headgroup. Further headgroups attached to archaeol were monohexose, MMPE, dimethyl  
348 phosphatidyl ethanolamine (DMPE), phosphatidyl ethanolamine (PE) and PH. Next to MMPE and  
349 PH, hydroxyarchaeol based IPLs also contained dihexose, monopentose, DMPE, PE, pentose-MMPE,  
350 hexose-MMPE and pentose-PE. Headgroups of GDGTs were found to be diphosphatidyl glycerol and  
351 dihexose phosphatidyl glycerol. The identification of a pentose as a headgroup of hydroxyarchaeol  
352 (mass loss of m/z 132) was unexpected. To our knowledge, this is the first description of a pentose as  
353 headgroup for microbial IPLs.

354 ANME-1 archaea mainly produce diglycosidic GDGTs, whereas lipids of marine ANME-2 and  
355 ANME-3 are dominated by phosphate-based polar derivatives of archaeol and hydroxyarchaeol  
356 (ANME-2: phosphatidyl glycerol, phosphatidyl ethanolamine, phosphatidyl inositol, phosphatidyl  
357 serine, dihexose; ANME-3: phosphatidyl glycerol, phosphatidyl inositol, phosphatidyl serine) (Rossel  
358 *et al.*, 2008). Furthermore, marine ANME-2 archaea produce only minor amounts of GDGT-based  
359 IPLs and ANME-3 archaea produce no GDGT-based IPLs at all (Rossel *et al.*, 2008). IPLs of ANME-  
360 2d archaea can be distinguished from those of ANME-1 archaea by the prevalence of phosphate  
361 containing headgroups as well as archaeol and hydroxyarchaeol based IPLs. Furthermore, ANME-2d  
362 can be distinguished from other ANME-2 and ANME-3 archaea by the high abundance of dihexose as  
363 headgroup, the rare MMPE and DMPE headgroups and putatively also the pentose headgroup, which  
364 so far has not been described in the literature. In contrast to ANME-3 archaea, ANME-2d and marine  
365 ANME-2 archaea produce GDGT-based IPLs, albeit only in minor amounts.

366 In marine environments, a variety of archaeal lipids including those identified in ANME archaea can  
367 be found, e.g. those of the abundant Thaumarchaeota (GDGTs with hexose or phosphohexose  
368 headgroups, Sinninghe Damsté *et al.*, 2012) and uncharacterized archaea (mainly GDGTs with  
369 glycosidic headgroups and in subsurface sediments also archaeol with glycosidic headgroups, Sturt *et*  
370 *al.*, 2004; Lipp *et al.*, 2008). In freshwater environments, IPLs of methanotrophic archaea have hardly  
371 been studied. Two studies on peat samples identified GDGTs with a glucose or glucuronosyl  
372 headgroup (Liu *et al.*, 2010) and with a hexose-glycuronic acid, phosphohexose, or hexose-  
373 phosphoglycerol head group (Peterse *et al.*, 2011). GDGTs with a hexose-phosphoglycerol head group  
374 were also identified in our study for ANME-2d archaea. Therefore, ANME-2d together with other  
375 archaea might be part of the peat microbial community based on the IPL profile. Using DNA  
376 biomarkers, most notably the 16S rRNA gene, *Ca. Methanoperedens* sp. has been detected in various  
377 peat ecosystems (Cadillo-Quiroz *et al.*, 2008; Zhang *et al.*, 2008; Wang *et al.*, 2019).

378 The related order *Methanosarcinales* mainly produce archaeol and hydroxyarchaeol with the  
379 headgroups glucose, phosphatidyl glycerol (only *Methanosarcinaceae*), phosphatidyl inositol,  
380 phosphatidyl ethanolamine, galactose (only *Methanosaetaceae*) (Koga *et al.*, 1998). On the other  
381 hand, members of the related order *Methanomicrobiales* contain GDGT-0 and archaeol with the lipid  
382 headgroups glucose, galactose, phosphatidyl aminopentanetetrols, phosphatidyl glycerol (Koga *et al.*,  
383 1998). Therefore, IPLs from *Ca. Methanoperedens* sp. differ from methanogen IPLs by the high  
384 abundance of dihexose, MMPE and phosphatidyl hexose as lipid headgroup and the absence of the  
385 quite common headgroup phosphatidyl serine.

386

### 387 **Incorporation of carbon derived from methane and bicarbonate in lipids**

388 We were not only interested in characterizing the lipids of *Ca. Methanoperedens* sp., but also in  
389 answering the question if the organism incorporates carbon derived from methane or from dissolved  
390 inorganic carbon (DIC) in its lipids. In a labelling experiment from 2006 with an ANME-2d  
391 enrichment culture, incorporation of carbon derived from methane could hardly be detected for  
392 archaeal lipids (Raghoebarsing *et al.*, 2006). To establish the carbon sources for *Ca. Methanoperedens*  
393 sp. we incubated the enrichment culture with <sup>13</sup>C labelled bicarbonate and methane and analysed lipid  
394 extracts for δ<sup>13</sup>C depletion by GC-IRMS (Fig. 2).

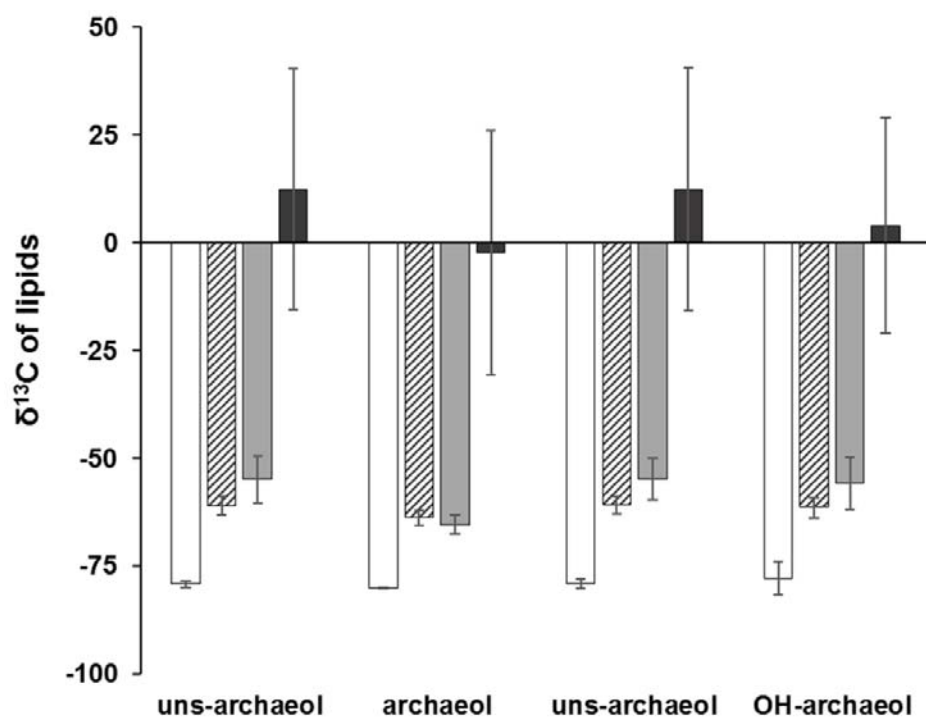

395

396 **Figure 2:  $\delta^{13}\text{C}$  values of *Ca. Methanoperedens sp.* lipids after batch cultivation with labelled bicarbonate**  
397 **or methane.**

398 ANME-2d reactor material originating from the Ooijpolder was incubated in anaerobic batch cultures with either  
399  $^{13}\text{C}$  labelled bicarbonate for three days (striped columns) or  $^{13}\text{C}$  labelled methane for one (light grey columns) or  
400 three days (dark grey columns) and analysed via GC-IRMS. Controls contained only non-labelled carbon sources  
401 (white columns). Incubations were performed in triplicates, error bars = standard deviation. Peak identification  
402 was conducted with the help of GC-MS analysis of the same samples, showing that lipid extracts contained  
403 archaeol, hydroxyarchaeol and two monounsaturated archaeols (Fig. 1). Uns-archaeol = monounsaturated  
404 archaeol.

405 Analysis of the isotopic composition of archaeol and its derivatives showed that ANME-2d archaea  
406 incorporated carbon derived from both methane and bicarbonate into their lipids. However, the main  
407 carbon source for biomass production seemed to be methane and not DIC as the former shows more  
408 label in the archaeal lipids. However, it has to be considered that the cultures to which  $^{13}\text{C}$  labelled  
409 bicarbonate was added did not exclusively contain  $^{13}\text{C}$ -DIC. About half of the DIC in the cultures  
410 derived from  $^{12}\text{C}$ - $\text{CO}_2$  dissolved in the medium after gassing with a mixture of 10%  $\text{CO}_2$ /90% Argon  
411 gas (calculations in the methods part). Considering this, the  $\delta^{13}\text{C}$  values of the archaeol isomers  
412 without  $^{12}\text{C}$ -DIC in the incubations would vary most probably between -40 and -60‰. Nevertheless,  
413 the respective lipids were still quite depleted in  $\delta^{13}\text{C}$  in comparison to the incubations with labelled  
414 methane (-2 to 12‰; 3 days incubation). Therefore, we concluded that mainly methane and not DIC is  
415 incorporated in the lipids of *Ca. Methanoperedens sp.*. Supporting this result, cultures containing  
416 marine ANME-1 and ANME-2 were shown to incorporate carbon derived from labelled methane into  
417 archaeol, monounsaturated archaeol and biphytanes (Blumenberg *et al.*, 2005). In another study it was  
418 found that ANME-1 archaea assimilated primarily inorganic carbon (Kellermann *et al.*, 2012).  
419 Incubations with sediments containing ANME-1, 2a & 2b archaea showed that both, labelled methane  
420 and inorganic carbon, were incorporated into the archaeal lipids (Wegener *et al.*, 2008). Incubations  
421 with freshwater sediments including ANME-2d archaea followed by RNA stable isotope probing  
422 demonstrated that those microbes mainly incorporated methane into their lipids but may have the

423 capability of mixed assimilation of CH<sub>4</sub> and dissolved inorganic carbon (Weber *et al.*, 2017). Our data  
 424 confirmed that ANME-2d archaea are capable of mixed assimilation of CH<sub>4</sub> and DIC, but that  
 425 methane is the preferred carbon source.

426

## 427 Conclusion

428

429 In this study, we analysed the lipids from the main player in nitrate AOM, *Ca. Methanoperedens* sp.  
 430 We found several lipid characteristics that enable distinction between ANME-2d and other ANME  
 431 groups (Table 2).

### 432 Table 2: Lipids of different ANME groups

433 For ANME-2d lipid analysis we used *Ca. Methanoperedens* sp. enriched bioreactor material. For the other  
 434 ANME groups information was based on publication about the specific lipid characteristic (Blumenberg *et al.*,  
 435 2004; Niemann and Elvert, 2008) or <sup>13</sup>C labelling experiments (Blumenberg *et al.*, 2005; Wegener *et al.*, 2008;  
 436 Kellermann *et al.*, 2012). GDGT: glycerol dialkyl glycerol tetraether, PE: phosphatidyl ethanolamine, MMPE:  
 437 monomethyl phosphatidyl ethanolamine, DMPE: dimethyl phosphatidyl ethanolamine, PG: phosphatidyl  
 438 glycerol, MH: monohexose, DH: dihexose, PH: phosphatidyl hexose, PC: phosphatidyl choline.

|                                             | ANME-1             | ANME-2a/b                                          | ANME-2c                                            | <b>ANME-2d</b>                                                                                | ANME-3                            |
|---------------------------------------------|--------------------|----------------------------------------------------|----------------------------------------------------|-----------------------------------------------------------------------------------------------|-----------------------------------|
| Environment                                 | marine             | marine                                             | marine                                             | <b>freshwater</b>                                                                             | marine                            |
| core lipids                                 | GDGT               | (OH-)<br>archaeol                                  | (OH-)<br>archaeol,<br>GDGTs                        | <b>(OH-)<br/>archaeol,<br/>(OH)-GDGTs</b>                                                     | (OH-)<br>archaeol                 |
| Sn-2-OH-<br>archaeol /<br>archaeol<br>ratio | 0 - 0.8            | 1.1 - 5.5                                          | 1.1 - 5.5                                          | <b>0.1 - 0.3</b>                                                                              | 1.1 - 5.5                         |
| IPLs                                        | GDGT +<br>dihexose | (OH-)<br>Archaeol +<br>PG, PE, PH,<br>PS, dihexose | (OH-)<br>Archaeol +<br>PG, PE, PH,<br>PS, Dihexose | <b>(OH-)<br/>archaeol +<br/>dihexose,<br/>hexose,<br/>pentose, PH,<br/>PE, MMPE,<br/>DMPE</b> | (OH-)<br>Archaeol +<br>PG, PH, PS |
| Main carbon<br>source                       | DIC                |                                                    |                                                    | <b>CH<sub>4</sub></b>                                                                         |                                   |

439

440 ANME-2d archaea therefore can be distinguished from ANME-1 by the higher ratio of archaeol and  
 441 hydroxyarchaeol instead of GDGTs as well as phosphate containing headgroups. Furthermore,  
 442 ANME-2d can be distinguished from other ANME-2 and ANME-3 archaea by the high abundance of  
 443 dihexose as headgroup, the rare MMPE and DMPE headgroups and putatively also the pentose  
 444 headgroup, which so far has not been described in the literature. The appearance of a monopentose as  
 445 headgroup of ANME-2d lipids is an interesting observation and might be further analysed in the  
 446 future. In contrast to other ANME groups ANME-2d archaea have been shown to produce relatively  
 447 rare hydroxylated GDGTs.

448 ANME groups do not only differ in their membrane lipids itself, but also in the way they incorporate  
449 carbon into their biomass. For ANME-1 it has been shown that primarily carbon derived from DIC is  
450 incorporated into the lipids (Kellermann *et al.*, 2012). In case of ANME-2d archaea, we were able to  
451 demonstrate that both, carbon derived from DIC and from methane, are incorporated into their lipids,  
452 with methane as the preferred carbon source.

453

## 454 Acknowledgements

455 CUW and MSMJ were supported by the Nederlandse Organisatie voor Wetenschappelijk Onderzoek  
456 through the Soehngen Institute of Anaerobic Microbiology Gravitation Grant 024.002.002 and the  
457 Netherlands Earth System Science Center Gravitation Grant 024.002.001. MSMJ was supported by  
458 the European Research Council Advanced Grant Ecology of Anaerobic Methane Oxidizing Microbes  
459 339880. JK was supported by the Netherlands Earth System Science Center Gravitation Grant  
460 024.002.001 and the Deutsche Forschungs Gesellschaft (DFG) Grant KU 3768/1-1. SB and CW were  
461 supported by the Nederlandse Organisatie voor Wetenschappelijk Onderzoek through Grant  
462 ALWOP.293. We thank Michel Koenen for IPL analysis, Ronald van Bommel for technical assistance  
463 with the GC-IRMS, Denise Dorhout and Monique Verweij for technical assistance with GC-MS and  
464 UHPLC systems. Moreover, we thank Annika Vaksmaa for supplying bioreactor material, Theo van  
465 Alen for technical assistance with metagenomics sequencing and Jeroen Frank for helping with  
466 metagenomics analysis.

## 467 References

- 468 Arshad, A., Speth, D.R., de Graaf, R.M., Op den Camp, H.J.M., Jetten, M.S.M., and Welte, C.U. (2015)  
469 A metagenomics-based metabolic model of nitrate-dependent anaerobic oxidation of methane  
470 by *Methanoperedens*-like archaea. *Front. Microbiol.* **6**: 1–14.
- 471 Bale, N.J., Villanueva, L., Hopmans, E.C., Schouten, S., and Sinninghe Damsté, J.S. (2013) Different  
472 seasonality of pelagic and benthic Thaumarchaeota in the North Sea. *Biogeosciences* **10**: 7195–  
473 7206.
- 474 Beal, E.J., House, C.H., and Orphan, V.J. (2009) Manganese- and iron-dependent marine methane  
475 oxidation. *Science*. **325**: 184–187.
- 476 Berger, S., Frank, J., Dalcin Martins, P., Jetten, M.S.M., and Welte, C.U. (2017) High-quality draft  
477 genome sequence of “*Candidatus* Methanoperedens sp.” Strain BLZ2, a nitrate-reducing  
478 anaerobic methane-oxidizing archaeon enriched in an anoxic bioreactor. *genome Announc.* **5**:  
479 e01159-17.
- 480 Blumenberg, M., Seifert, R., Nauhaus, K., and Pape, T. (2005) In vitro study of lipid biosynthesis in an  
481 anaerobically methane-oxidizing microbial mat. *Appl. Environ. Microbiol.* **71**: 4345–4351.
- 482 Blumenberg, M., Seifert, R., Reitner, J., Pape, T., and Michaelis, W. (2004) Membrane lipid patterns  
483 typify distinct anaerobic methanotrophic consortia. *Proc. Natl. Acad. Sci.* **101**: 11111–11116.
- 484 Boetius, A., Ravensschlag, K., Schubert, C.J., Rickert, D., Widdel, F., Gieseke, A., et al. (2000) A marine  
485 microbial consortium apparently mediating anaerobic oxidation of methane. *Nature* **407**: 623–  
486 626.
- 487 Cadillo-Quiroz, H., Yashiro, E., Yavitt, J.B., and Zinder, S.H. (2008) Characterization of the archaeal  
488 community in a minerotrophic fen and terminal restriction fragment length polymorphism-

- 489 directed isolation of a novel hydrogenotrophic methanogen. *Appl. Environ. Microbiol.* **74**: 2059–  
490 2068.
- 491 Cai, C., Leu, A.O., Xie, G.-J., Guo, J., Feng, Y., Zhao, J.-X., et al. (2018) A methanotrophic archaeon  
492 couples anaerobic oxidation of methane to Fe (III) reduction. *ISME J.* **12**: 1929–1939.
- 493 Conrad, R. (2009) The global methane cycle: Recent advances in understanding the microbial  
494 processes involved. *Environ. Microbiol. Rep.* **1**: 285–292.
- 495 Dean, J.F., Middelburg, J.J., Roeckmann, T., Aerts, R., Blauw, L.G., Egger, M., et al. (2018) Methane  
496 feedbacks to the global climate system in a warmer world. *Rev. Geophys.* **56**: 207–250.
- 497 Ekiel, I. and Sprott, G.D. (1992) Identification of degradation artifacts formed upon treatment of  
498 hydroxydiether lipids from methanogens with methanolic HCl. *Can. J. Microbiol.* **38**: 764–768.
- 499 Elvert, M., Hopmans, E., Treude, T., Boetius, A., and Suess, E. (2005) Spatial variations of  
500 methanotrophic consortia at cold methane seeps: implications from a high-resolution molecular  
501 and. *Geobiology* **3**: 195–209.
- 502 Elvert, M., Suess, E., and Whiticar, M.J. (1999) Anaerobic methane oxidation associated with marine  
503 gas hydrates: superlight C-isotopes from saturated and unsaturated C<sub>20</sub> and C<sub>25</sub> irregular  
504 isoprenoids. *Naturwissenschaften* **86**: 295–300.
- 505 Ettwig, K.F., Butler, M.K., Le Paslier, D., Pelletier, E., Mangenot, S., Kuypers, M.M.M., et al. (2010)  
506 Nitrite-driven anaerobic methane oxidation by oxygenic bacteria. *Nature* **464**: 543–548.
- 507 Ettwig, K.F., Zhu, B., Speth, D., Keltjens, J.T., Jetten, M.S.M., and Kartal, B. (2016) Archaea catalyze  
508 iron-dependent anaerobic oxidation of methane. *Proc. Natl. Acad. Sci. U. S. A.* **113**: 127922–  
509 12796.
- 510 Franzmann, P.D., Stackebrandt, E., Sanderson, K., Volkman, J.K., Cameron, D.E., Stevenson, P.L., et al.  
511 (1988) *Halobacterium lacusprofundi* sp. nov., a halophilic bacterium isolated from Deep Lake,  
512 Antarctica. *Syst. Appl. Microbiol.* **11**: 20–27.
- 513 Gibson, J.A.E., Miller, M.R., Davies, N.W., Neill, G.P., Nichols, D.S., and Volkman, J.K. (2005)  
514 Unsaturated diether lipids in the psychrotrophic archaeon *Halorubrum lacusprofundi*. *Syst.*  
515 *Appl. Microbiol.* **28**: 19–26.
- 516 Hafenbradl, D., Keller, M., Thiericke, R., and Stetter, K.O. (1993) A novel unsaturated archaeal ether  
517 core lipid from the hyperthermophile *Methanopyrus kandleri*. *Syst. Appl. Microbiol.* **16**: 165–  
518 169.
- 519 Hallam, S.J., Putnam, N., Preston, C.M., Detter, J.C., Rokhsar, D., Richardson, P.M., and DeLong, E.F.  
520 (2004) Reverse methanogenesis: testing the hypothesis with environmental genomics. *Science*.  
521 **305**: 1457–1463.
- 522 Haroon, M.F., Hu, S., Shi, Y., Imelfort, M., Keller, J., Hugenholtz, P., et al. (2013) Anaerobic oxidation  
523 of methane coupled to nitrate reduction in a novel archaeal lineage. *Nature* **500**: 567–570.
- 524 Hinrichs, K.-U., Hayes, J.M., Sylva, S.P., Brewer, G.B., and DeLong, E.F. (1999) Methane-consuming  
525 archaeobacteria in marine sediments. *Nature* **398**: 802–805.
- 526 Hinrichs, K.-U., Pancost, R.D., Summons, R.E., Sprott, G.D., Sylva, S.P., Sinninghe Damsté, J.S., and  
527 Hayes, J.M. (2000) Mass spectra of sn-2-hydroxyarchaeol, a polar lipid biomarker for anaerobic  
528 methanotrophy. *Geochemistry Geophys. Geosystems* **1**: 2000GC000042.
- 529 Hinrichs, K. and Boetius, A. (2002) The anaerobic oxidation of methane: new insights in microbial  
530 ecology and biogeochemistry. In: Wefer, G., Billett, D., Hebbeln, D., Jørgensen, B., Schlüter, M.,  
531 and van Weering, T. (eds), *Ocean margin systems*. Springer-Verlag, Berlin, pp. 457–477.



- 532 Hoehler, T.M., Alperin, M.J., Albert, D.B., and Martens, C.S. (1994) Field and laboratory studies of  
533 methane oxidation in an anoxic marine sediment: Evidence for a methanogen-sulfate reducer  
534 consortium. *Global Biogeochem. Cycles* **8**: 451–463.
- 535 Hu, S., Zeng, R.J., Burow, L.C., Lant, P., Keller, J., and Yuan, Z. (2009) Enrichment of denitrifying  
536 anaerobic methane oxidizing microorganisms. *Environ. Microbiol. Rep.* **1**: 377–384.
- 537 Kellermann, M.Y., Wegener, G., Elvert, M., Yoshinaga, M.Y., Lin, Y.-S., Holler, T., et al. (2012)  
538 Autotrophy as a predominant mode of carbon fixation in anaerobic methane-oxidizing microbial  
539 communities. *Proc. Natl. Acad. Sci.* **109**: 19321–19326.
- 540 Knittel, K. and Boetius, A. (2009) Anaerobic oxidation of methane: progress with an unknown  
541 process. *Annu. Rev. Microbiol.* **63**: 311–334.
- 542 Koga, Y. and Morii, H. (2007) Biosynthesis of ether-type polar lipids in Archaea and evolutionary  
543 considerations. *Microbiol. Mol. Biol. Rev.* **71**: 97–120.
- 544 Koga, Y., Morii, H., Akagawa-Matsushita, M., and Ohga, M. (1998) Correlation of polar lipid  
545 composition with 16S rRNA phylogeny in methanogens. Further analysis of lipid component  
546 parts. *Biosci. Biotechnol. Biochem.* **62**: 230–236.
- 547 Koga, Y., Nishihara, M., Morii, H., and Akagawa-Matsushita, M. (1993) Ether polar lipids of  
548 methanogenic bacteria: structures, comparative aspects, and biosyntheses. *Microbiol. Rev.* **57**:  
549 164–182.
- 550 Kool, D.M., Zhu, B., Rijpstra, W.I.C., Jetten, M.S.M., Ettwig, K.F., and Sinninghe Damsté, J.S. (2012)  
551 Rare branched fatty acids characterize the lipid composition of the intra-aerobic methane  
552 oxidizer “*Candidatus Methylopirabilis oxyfera*.” *Appl. Environ. Microbiol.* **78**: 8650–8656.
- 553 Lipp, J.S., Morono, Y., Inagaki, F., and Hinrichs, K.-U. (2008) Significant contribution of Archaea to  
554 extant biomass in marine subsurface sediments. *Nat. Lett.* **454**: 991–994.
- 555 Liu, X.-L., Lipp, J.S., Simpson, J.H., Lin, Y.-S., Summons, R.E., and Hinrichs, K.-U. (2012) Mono- and  
556 dihydroxyl glycerol dibiphytanyl glycerol tetraethers in marine sediments: Identification of both  
557 core and intact polar lipid forms. *Geochim. Cosmochim. Acta* **89**: 102–115.
- 558 Liu, X., Leider, A., Gillespie, A., Gröger, J., Versteegh, G.J.M., and Hinrichs, K.-U. (2010) Organic  
559 Geochemistry Identification of polar lipid precursors of the ubiquitous branched GDGT orphan  
560 lipids in a peat bog in Northern Germany. *Org. Geochem.* **41**: 653–660.
- 561 Matsumi, R., Atomi, H., Driessen, A.J.M., and van der Oost, J. (2011) Isoprenoid biosynthesis in  
562 archaea - biochemical and evolutionary implications. *Res. Microbiol.* **162**: 39–52.
- 563 McAnulty, M.J., Poosarla, V.G., Kim, K.-Y., Jasso-Chávez, R., Logan, B.E., and Wood, T.K. (2017)  
564 Electricity from methane by reversing methanogenesis. *Nat. Commun.* **8**: 15419.
- 565 Menzel, P., Ng, K.L., and Krogh, A. (2016) Fast and sensitive taxonomic classification for  
566 metagenomics with Kaiju. *Nat. Commun.* **7**: 1–9.
- 567 Nauhaus, K., Albrecht, M., Elvert, M., Boetius, A., and Widdel, F. (2007) In vitro cell growth of marine  
568 archaeal-bacterial consortia during anaerobic oxidation of methane with sulfate. *Environ.*  
569 *Microbiol.* **9**: 187–196.
- 570 NCBI Resource Coordinators (2016) Database resources of the National Center for Biotechnology  
571 Information. *Nucleic Acids Res.* **44**: 7–19.
- 572 Nichols, P.D. and Franzmann, P.D. (1992) Unsaturated diether phospholipids in the Antarctic  
573 methanogen *Methanococcoides burtonii*. *FEMS Microbiol. Lett.* **98**: 205–208.
- 574 Nichols, P.D., Shaw, P.M., Mancuso, C.A., and Franzmann, P.D. (1993) Analysis of archaeal

- 575 phospholipid-derived di- and tetraether lipids by high temperature capillary gas  
576 chromatography. *J. Microbiol. Methods* **18**: 1–9.
- 577 Niemann, H. and Elvert, M. (2008) Diagnostic lipid biomarker and stable carbon isotope signatures of  
578 microbial communities mediating the anaerobic oxidation of methane with sulphate. *Org.*  
579 *Geochem.* **39**: 1668–1677.
- 580 Niemann, H., Lösekann, T., de Beer, D., Elvert, M., Nadalig, T., Knittel, K., et al. (2006) Novel microbial  
581 communities of the Haakon Mosby mud volcano and their role as a methane sink. *Nature* **443**:  
582 854–858.
- 583 Nishihara, M., Morii, H., Matsuno, K., Ohga, M., Stetter, O., and Koga, Y. (2002) Structural analysis by  
584 reductive cleavage with LiAlH<sub>4</sub> of an allyl ether choline-phospholipid, archaetidylcholine, from  
585 the hyperthermophilic methanoarchaeon *Methanopyrus kandleri*. *Archaea* **1**: 123–131.
- 586 Orphan, V.J., House, C.H., Hinrichs, K.-U., McKeegan, K.D., and DeLong, E.F. (2002) Multiple archaeal  
587 groups mediate methane oxidation in anoxic cold seep sediments. *Proc. Natl. Acad. Sci. U. S. A.*  
588 **99**: 7663–7668.
- 589 Pancost, R.D., Hopmans, E.C., and Sinninghe Damsté, J.S. (2001) Archaeal lipids in mediterranean cold  
590 seeps: molecular proxies for anaerobic methane oxidation. *Geochim. Cosmochim. Acta* **65**:  
591 1611–1627.
- 592 Pancost, R.D., Sinninghe Damsté, J.S., de Lint, S., van der Maarel, M.J.E.C., and Gottschal, J.C. (2000)  
593 Biomarker evidence for widespread anaerobic methane oxidation in mediterranean sediments  
594 by a consortium of methaogenic archaea and bacteria. *Appl. Environ. Microbiol.* **66**: 1126–1132.
- 595 Peterse, F., Hopmans, E.C., Schouten, S., Mets, A., Rijpstra, W.I.C., and Sinninghe Damsté, J.S. (2011)  
596 Identification and distribution of intact polar branched tetraether lipids in peat and soil. *Org.*  
597 *Geochem.* **42**: 1007–1015.
- 598 Raghoebarsing, A.A., Pol, A., van de Pas-Schoonen, K.T., Smolders, A.J.P., Ettwig, K.F., Rijpstra, W.I.C.,  
599 et al. (2006) A microbial consortium couples anaerobic methane oxidation to denitrification.  
600 *Nature* **440**: 918–921.
- 601 De Rosa, M. and Gambacorta, A. (1988) The lipids of archaeobacteria. *Prog. Lipid Res.* **27**: 153–175.
- 602 Rossel, P.E., Lipp, J.S., Fredricks, H.F., Arnds, J., Boetius, A., Elvert, M., and Hinrichs, K.U. (2008) Intact  
603 polar lipids of anaerobic methanotrophic archaea and associated bacteria. *Org. Geochem.* **39**:  
604 992–999.
- 605 Ruetters, H., Sass, H., Cypionka, H., and Rullkoetter, J. (2002) Phospholipid analysis as a tool to study  
606 complex microbial communities in marine sediments. *J. Microbiol. Methods* **48**: 149–160.
- 607 Schouten, S., Hopmans, E.C., and Sinninghe Damsté, J.S. (2012) The organic geochemistry of glycerol  
608 dialkyl glycerol tetraether lipids: A review. *Org. Geochem.* **54**: 19–61.
- 609 Sinninghe Damsté, J.S., Rijpstra, W.I.C., Hopmans, E.C., Jung, M.-Y., Kim, J.-G., Rhee, S.-K., et al.  
610 (2012) Intact polar and core glycerol dibiphytanyl glycerol tetraether lipids of group I.1a and  
611 I.1b Thaumarchaeota in soil. *Appl. Environ. Microbiol.* **78**: 6866–6874.
- 612 Sturt, H.F., Summons, R.E., Smith, K., Elvert, M., and Hinrichs, K. (2004) Intact polar membrane lipids  
613 in prokaryotes and sediments deciphered by high-performance liquid chromatography /  
614 electrospray ionization multistage mass spectrometry — new biomarkers for biogeochemistry  
615 and microbial ecology. 617–628.
- 616 Timmers, P.H.A., Welte, C.U., Koehorst, J.J., Plugge, C.M., Jetten, M.S.M., and Stams, A.J.M. (2017)  
617 Reverse methanogenesis and respiration in methanotrophic archaea. *Archaea* **2017**: 1654237.
- 618 Vaksmaa, A., Guerrero-Cruz, S., van Alen, T.A., Cremers, G., Ettwig, K.F., Lüke, C., and Jetten, M.S.M.

- 619 (2017) Enrichment of anaerobic nitrate-dependent methanotrophic “*Candidatus*  
620 *Methanoperedens nitroreducens*” archaea from an Italian paddy field soil. *Appl. Microbiol.*  
621 *Biotechnol.* **101**: 7075–7084.
- 622 Vaksmaa, A., Jetten, M.S.M., Ettwig, K.F., and Lücke, C. (2017) *McrA* primers for the detection and  
623 quantification of the anaerobic archaeal methanotroph “*Candidatus* *Methanoperedens*  
624 *nitroreducens*.” *Appl. Microbiol. Biotechnol.* **101**: 1631–1641.
- 625 Wang, M., Tian, J., Bu, Z., Lamit, L.J., Chen, H., Zhu, Q., and Peng, C. (2019) Structural and functional  
626 differentiation of the microbial community in the surface and subsurface peat of two  
627 minerotrophic fens in China. *Plant Soil.* doi.org/10.1007/s11104-019-03962-w.
- 628 Weber, H.S., Habicht, K.S., and Thamdrup, B. (2017) Anaerobic methanotrophic archaea of the  
629 ANME-2d cluster are active in a low-sulfate, iron-rich freshwater sediment. *Front. Microbiol.* **8**:  
630 1–13.
- 631 Wegener, G., Niemann, H., Elvert, M., Hinrichs, K.U., and Boetius, A. (2008) Assimilation of methane  
632 and inorganic carbon by microbial communities mediating the anaerobic oxidation of methane.  
633 *Environ. Microbiol.* **10**: 2287–2298.
- 634 Zhang, G., Tian, J., Jiang, N., Guo, X., Wang, Y., and Dong, X. (2008) Methanogen community in Zoige  
635 wetland of Tibetan plateau and phenotypic characterization of a dominant uncultured  
636 methanogen cluster ZC-I. *Environ. Microbiol.* **10**: 1850–1860.
- 637
